# Supplementary material for: Optimization of Ethanolic Extraction of Enantia chloranta Bark, Phytochemical Composition, Green Synthesis of Silver Nanoparticles, and Antimicrobial Activity
Source: MDPI journal article supplement (doi:10.3390/fermentation8100530), 2022-10-11
Supplement: s1 [file s1]

Table S2: Elemental composition of *O-ECB* and green synthesized AgNPs

| Chemical element | Enantia chlorantha bark extract, dry |                    | Solution of synthesized AgNPs       |                    |
|------------------|--------------------------------------|--------------------|-------------------------------------|--------------------|
|                  | Mean fluorescence intensity, cps/uA  | Standard deviation | Mean fluorescence intensity, cps/uA | Standard deviation |
| Si               | 0,0581                               | 0,0024             | 0,0529                              | 0,013              |
| S                | 0,2052                               | 0,0028             | 0,5193                              | 0,0175             |
| Cl               | 2,5942                               | 0,0097             | 0,0485                              | 0,0055             |
| K                | 0,6511                               | 0,0010             | 0,0460                              | 0,0451             |
| Ca               | 0,6185                               | 0,0253             | -                                   | -                  |
| Mn               | 0,1482                               | 0,0033             | -                                   | -                  |
| Fe               | 3,4854                               | 0,0127             | -                                   | -                  |
| Zn               | 0,1624                               | 0,0014             | -                                   | -                  |
| Br               | 4,6529                               | 0,0114             | -                                   | -                  |
| Ag               | -                                    | -                  | 0,6489                              | 0,0236             |
