# Supplementary material for: Optimization of Ethanolic Extraction of Enantia chloranta Bark, Phytochemical Composition, Green Synthesis of Silver Nanoparticles, and Antimicrobial Activity
Source: MDPI journal article supplement (doi:10.3390/fermentation8100530), 2022-10-11
Supplement: s1 [file s1]

**Table S1 : Bacterial strains used and their susceptibility profile to antibiotics.**

|               | Microorganisms                         | Resistant                  | Intermediate  | Sensitive                                |
|---------------|----------------------------------------|----------------------------|---------------|------------------------------------------|
| Gram negative | <i>Achromobacter xylosoxidans</i> 4892 | TR, NIT, TE, FO            | CAC, CAZ      | CTR, AMC, IPM, CIP, AMP                  |
|               | <i>Acinetobacter baumannii</i> 5841    | TR                         | TE, CAC       | NIT, CTR, AMC, FO, CAZ, IPM, CIP, AMP    |
|               | <i>Citrobacter freundii</i> 426        | CAZ, CAC, AMP              |               | NIT, TE, CTR, AMC, FO, IPM, CIP, TR      |
|               | <i>Enterococcus cloacae</i> 6392       | AMP, TR                    | NIT,          | TE, CTR, AMC, FO, CAZ, IPM, CAC, CIP,    |
|               | <i>Escherichia coli</i> M17            | To all                     |               |                                          |
|               | <i>Escherichia coli</i> 1449           | TE, CTR, CAZ, CAC, AMP, TR |               | NIT, AMC, FO, IPM, CIP                   |
|               | <i>Escherichia coli</i> ATCC 25922     | To all                     |               |                                          |
|               | <i>Klebsiella oxytoca</i> 3003         | TE, AMP, TR                | CAZ, CAC      | NIT, CTR, AMC, FO, IPM, CIP              |
|               | <i>Klebsiella pneumoniae</i> 1449      | AMP                        | NIT, CAZ, CAC | TE, CTR, AMC, FO, IPM, CIP, TR           |
|               | <i>Moraxella catarrhalis</i> 4222      | NIT, AMP                   | CAZ, TR       | TE, CTR, AMC, FO, CAC, IPM, CIP          |
|               | <i>Morganella morganii</i> 1543        | TE, FO, AMP, TR            | NIT           | CTR, AMC, CTR, CAZ, IPM, CAC, CIP        |
|               | <i>Proteus mirabilis</i> 1543          | TE, TR                     | AMP           | NIT, AMC, CTR, FO, CAZ, IPM, CAC, CIP,   |
|               | <i>Pseudomonas aeruginosa</i> 3057     | NIT, TE, AMP, TR           | CAZ           | CTR, AMC, FO, CAC, CIP                   |
|               | <i>Serratia marsescens</i> 6441        | NIT, AMP                   |               | TE, CTR, AMC, FO, CAZ, IPM, CAC, CIP, TR |
| Gram positive | <i>Corynebacterium spp</i> 1638        | FO, CAZ, CAC, AMP, TR      |               | NIT, TTE, CTR, AMC, IPM, CIP             |
|               | <i>Enterococcus avium</i> 1669         | TE, AMP, TR                | CIP           | NIT, CTR, AMC, FO, CAZ, IPM, CAC,        |
|               | <i>Enterococcus faecalis</i> 5960      | TE, AMP, TR                | CAZ,          | NIT, CTR, AMC, FO, IMP, CAC, CIP         |
|               | <i>Kocuria rizophilis</i> 1542         | NIT, TE, CAZ, CAC, AMP     |               | CTR, AMC, FO, IPM, CIP, TR               |

|  |                                           |                      |     |                               |
|--|-------------------------------------------|----------------------|-----|-------------------------------|
|  | <i>Staphylococcus aureus</i><br>1449      | CAZ, CAC,<br>AMP, TR | NIT | TE, CTR, AMC, FO, IPM,<br>CIP |
|  | <i>Staphylococcus aureus</i><br>ATCC 6538 | To all               |     |                               |

AMC=amoxiclav, CAZ=ceftazidime, CAC= ceftazidime/clavulanic acid, CTR=ceftriaxone;  
CIP=ciprofloxacin, FO=fosfomycin, IMP=imipenem, NIT=nitrofurantoin, TE=tetracycline and  
TR=trimethoprim.
